# Supplementary material for: Human mesenchymal stromal cells enhance the immunomodulatory function of CD8+CD28− regulatory T cells
Source: PubMed Central journal article supplement — Cell Mol Immunol. 2014 Dec 8;12(6):708–18. doi: 10.1038/cmi.2014.118 (PMC4716622; doi:10.1038/cmi.2014.118), 2014-12-08
Supplement: cmi2014118x1.pdf [file cmi2014118x1.pdf]

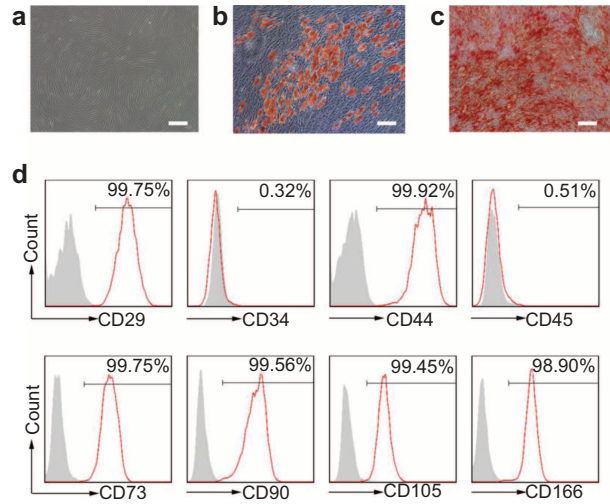

**Supplemental Figure 1** Characterization of healthy donor-derived MSCs. The morphology of human MSCs (passage 5) was revealed by phase contrast microscopy (a). The adipogenic and osteogenic differentiation of the human MSCs were shown by oil red O staining (b) and Alizarin red S staining (c). Cell surface markers of human MSCs were detected by flow cytometry (d). Scale bar=200  $\mu$ M.

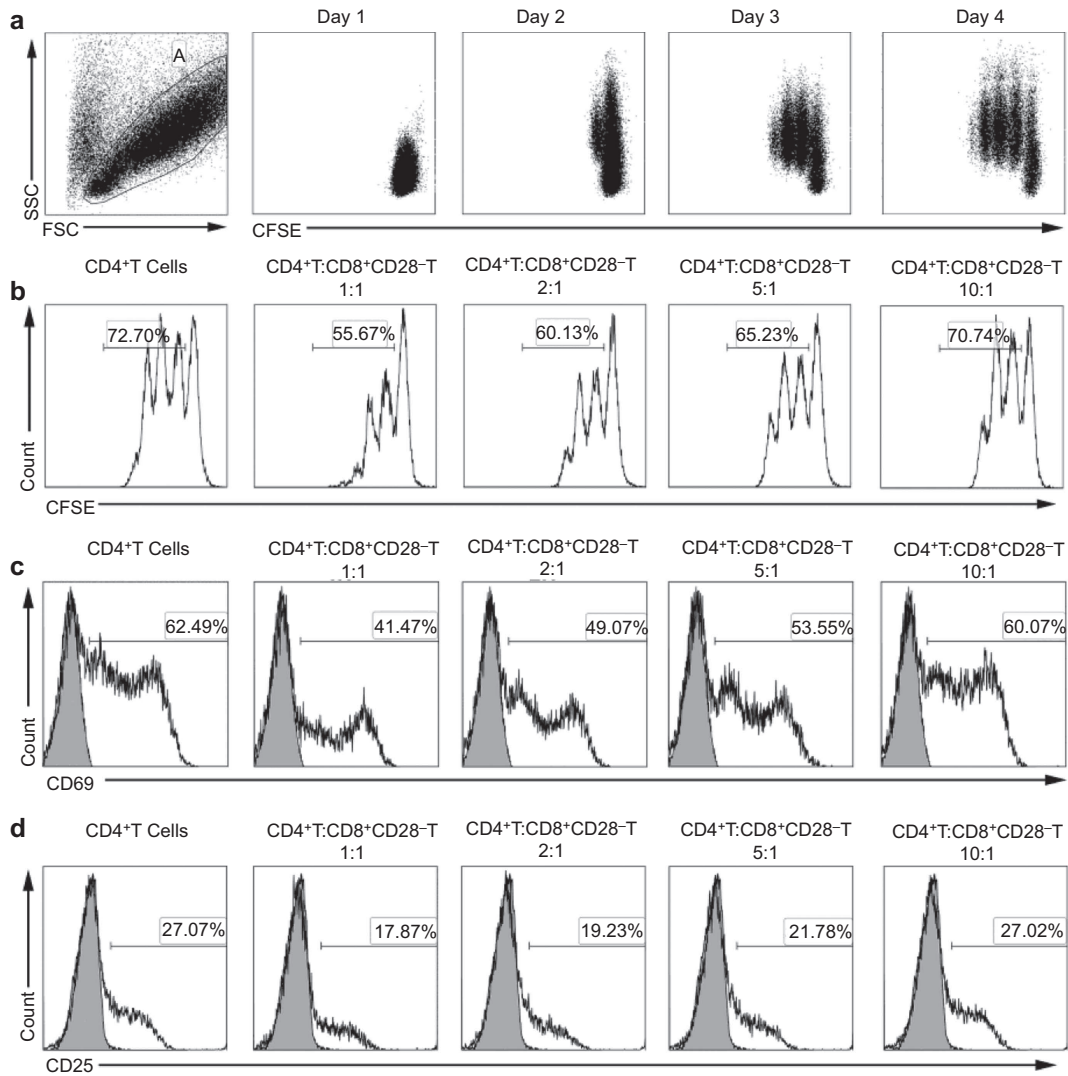

**Supplemental Figure 2** The proliferation and activation of naive CD4<sup>+</sup> T cells are dose dependently inhibited by the CD8<sup>+</sup>CD28<sup>-</sup> T cells. The T cell proliferative response was evaluated by the dilution of the CFSE expression. Representative experiments are depicted (a). The regulation effects of CD8<sup>+</sup>CD28<sup>-</sup> T cells on T-cell proliferation were evaluated by coculturing with different ratios of CD4<sup>+</sup> T cells (b). The regulation effects of CD8<sup>+</sup>CD28<sup>-</sup> T cells on T-cell activation were evaluated by the expression of CD69 (c) and CD25 (d) on naive CD4<sup>+</sup> T cells that cocultured with different ratios of CD8<sup>+</sup>CD28<sup>-</sup> T cells in the presence of a stimulus for 24 h. The gray histograms correspond to the isotype controls.

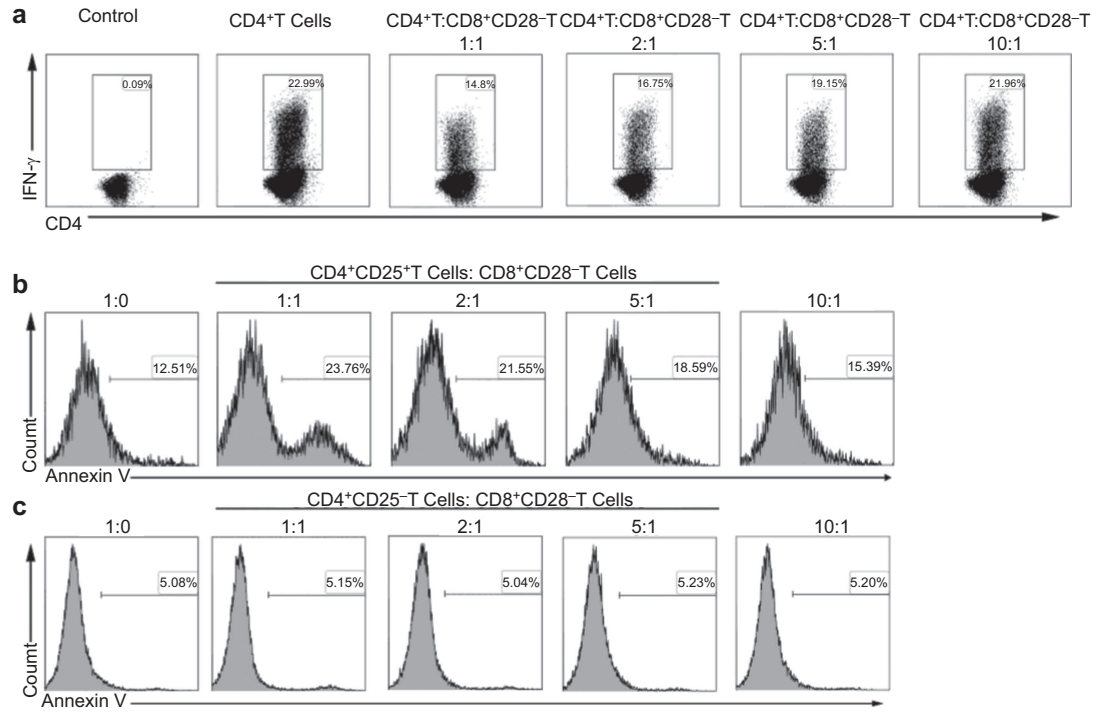

**Supplemental Figure 3** CD8<sup>+</sup>CD28<sup>-</sup> T cells dose-dependently inhibit IFN- $\gamma$  production by responder CD4<sup>+</sup> T cells and induce activated CD4<sup>+</sup> T cells apoptosis. The indicated cells were cocultured at ratios of 0:1, 1:1, 2:1, 5:1 and 10:1 for 3 days, and the effects on regulating the production of IFN- $\gamma$  expressed by CD4<sup>+</sup> T cells were assessed by intracellular cytokine staining (a). The isolated CD4<sup>+</sup>CD25<sup>+</sup> T cells (activated) (b) and CD4<sup>+</sup>CD25<sup>-</sup> T cells (non-activated) (c) were respectively cocultured with CD8<sup>+</sup>CD28<sup>-</sup> T cells for 6 h at ratios of 0:1, 1:1, 2:1, 5:1 and 10:1. The percentage of Annexin V-positive cells within the total CD4<sup>+</sup> T-cell population was then analyzed by flow cytometry.

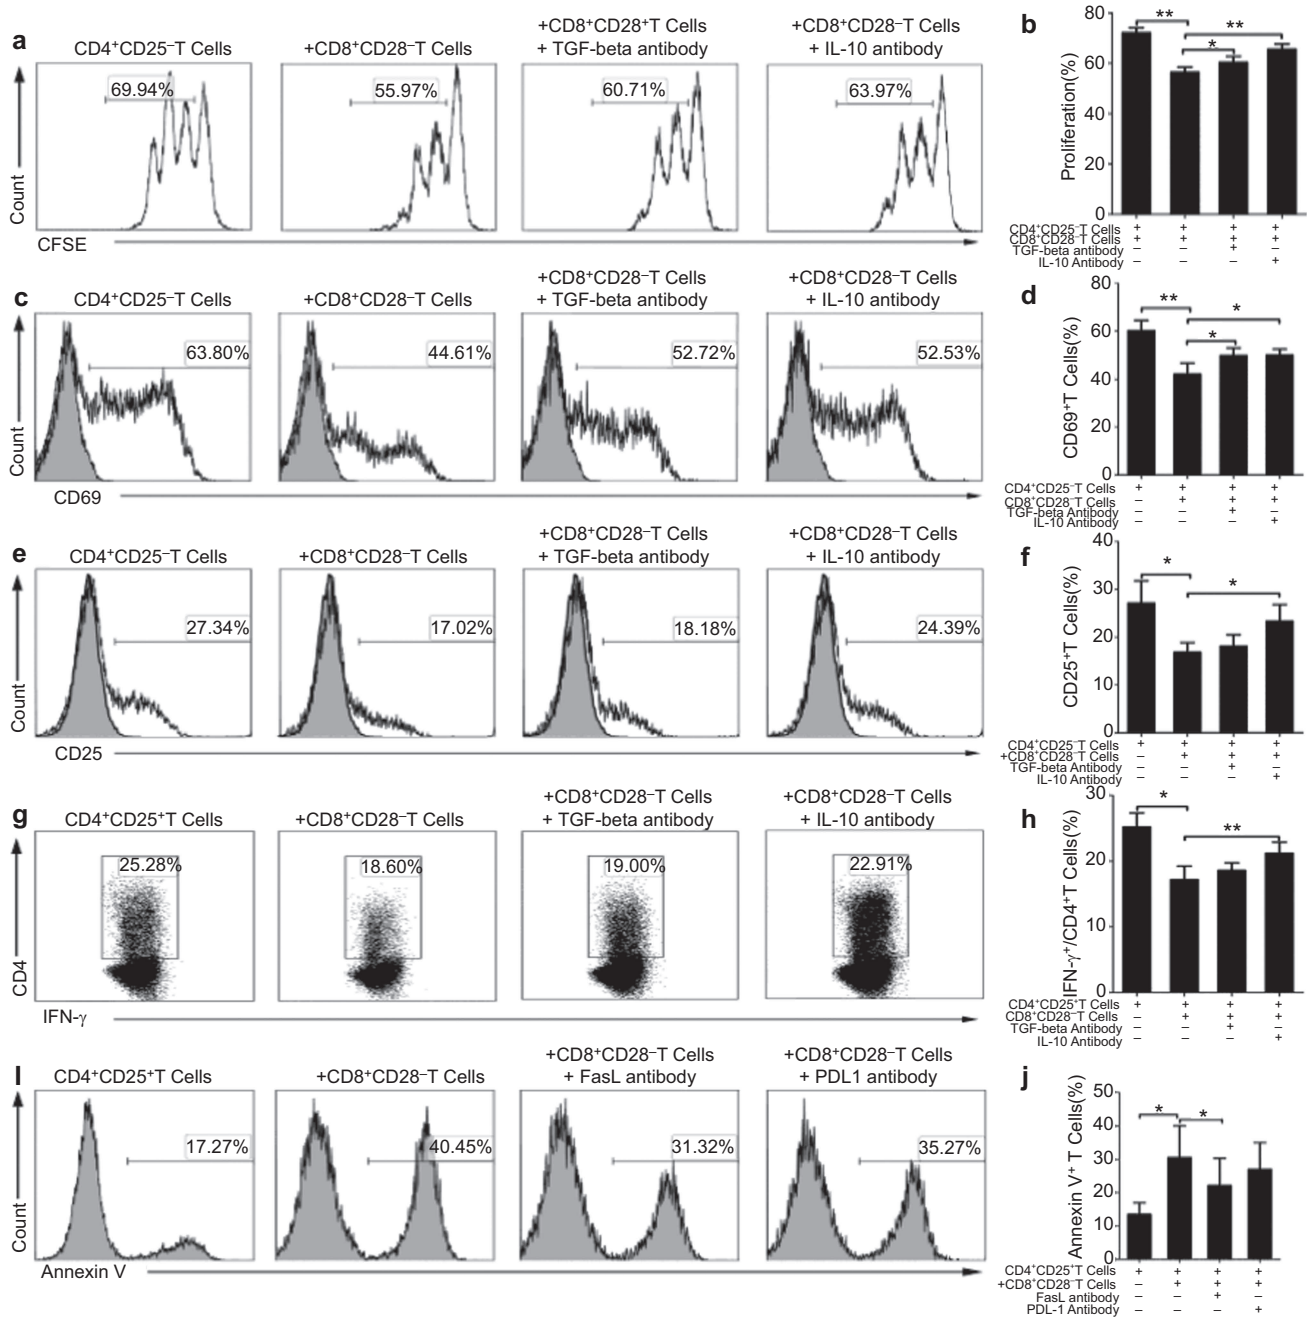

**Supplemental Figure 4** CD8<sup>+</sup>CD28<sup>-</sup> T cells exert the immunomodulatory function through TGF- $\beta$ , IL-10 or FasL. The CD8<sup>+</sup>CD28<sup>-</sup> T cells were cocultured with naive CD4<sup>+</sup> T cells at a ratio of 1 : 1. Anti-TGF- $\beta$  and IL-10 neutralizing antibodies were added to the coculture system, and their affection in the regulation of CD8<sup>+</sup>CD28<sup>-</sup> T cells on CD4<sup>+</sup> T cells were evaluated, including on proliferation (**a, b**), activation (**c-f**) and IFN- $\gamma$  production (**g, h**) of CD4<sup>+</sup> T cells. Similarly, anti-FasL and anti-PD-L1 neutralizing antibodies were added, and the Annexin V-positive CD4<sup>+</sup> T cells were less, efficiently inhibited by FasL neutralization (**i, j**). The results are representative of three independent experiments. The bar graphs indicate the means  $\pm$  s.d. Statistically significant differences are indicated as follows: \* $P$ <0.05 and \*\* $P$ <0.01.

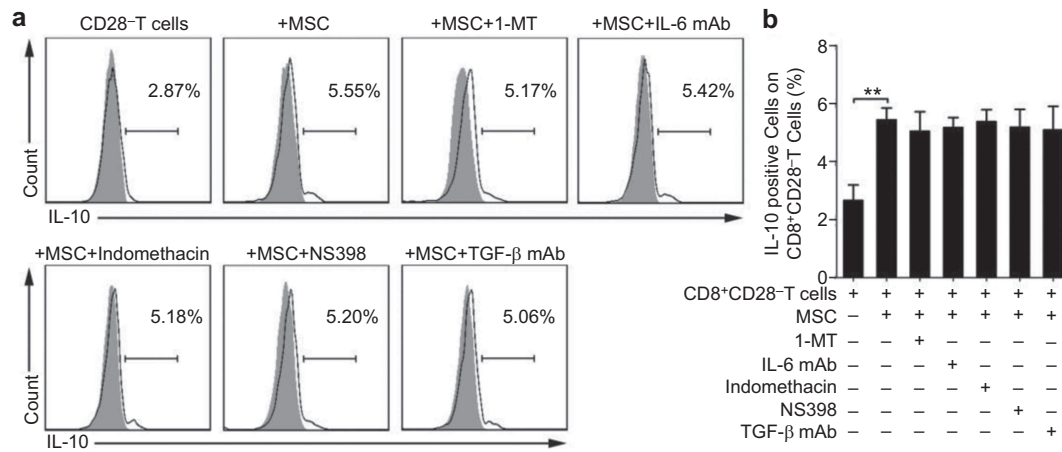

**Supplemental Figure 5** The mechanisms of MSCs affect the IL-10 expression on CD8<sup>+</sup>CD28<sup>-</sup> T cells. The expression of IL-10 on CD8<sup>+</sup>CD28<sup>-</sup> T cells from healthy donors increased after the cocultured with MSCs. Neither inhibitors nor neutralization antibodies could reverse the expression of IL-10 (**a, b**). The gray histograms correspond to the isotype controls. Data are representative of three experiments. The bar graphs indicate the means  $\pm$  s.d. Statistically significant differences are indicated as follows: \*\* $P < 0.01$ .

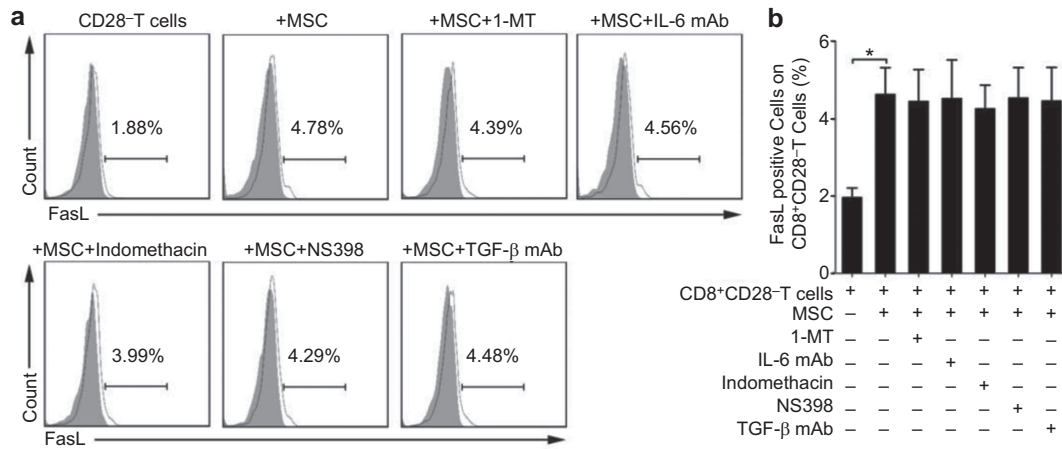

**Supplemental Figure 6** The mechanisms of MSCs affect the FasL expression on CD8<sup>+</sup>CD28<sup>-</sup> T cells. The expression of FasL on CD8<sup>+</sup>CD28<sup>-</sup> T cells from healthy donors increased after the cocultured with MSCs. Neither inhibitors nor neutralization antibodies could reverse the expression of FasL (**a**, **b**). The gray histograms correspond to the isotype controls. Data are representative of three experiments. The bar graphs indicate the means  $\pm$  s.d. Statistically significant differences are indicated as follows: \* $P < 0.05$ .

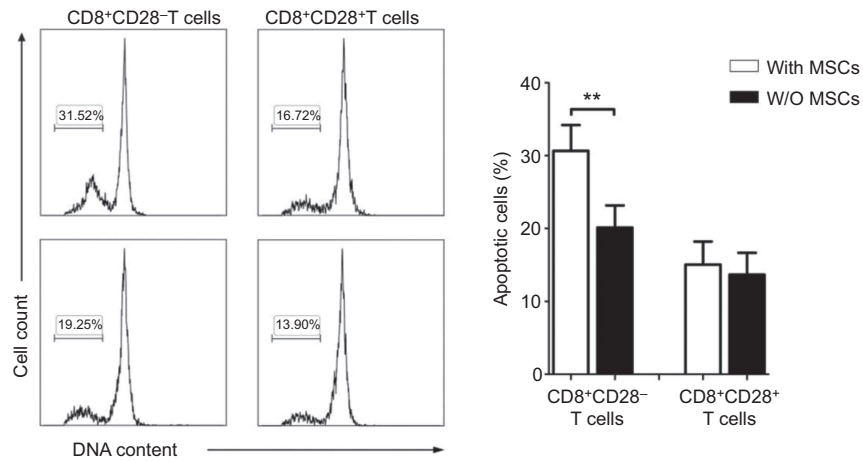

**Supplemental Figure 7** MSCs inhibit CD8<sup>+</sup>CD28<sup>-</sup> T cells apoptosis. CD8<sup>+</sup>CD28<sup>-</sup> T cells and CD8<sup>+</sup>CD28<sup>+</sup> T cells were respectively cocultured with MSCs at a ratio of 5 : 1 (T cells : MSCs), and T cells were harvested at the indicated time points, then permeabilized and stained with propidium iodide to reveal hypodiploid peaks characteristic of apoptotic cells. MSCs significantly decreased the apoptosis of CD8<sup>+</sup>CD28<sup>-</sup> T cells, but not obviously affect the CD8<sup>+</sup>CD28<sup>+</sup> T cells. Data are representative of three experiments. The bar graphs indicate the means ± s.d. Statistically significant differences are indicated as follows: \*\**P* < 0.01.

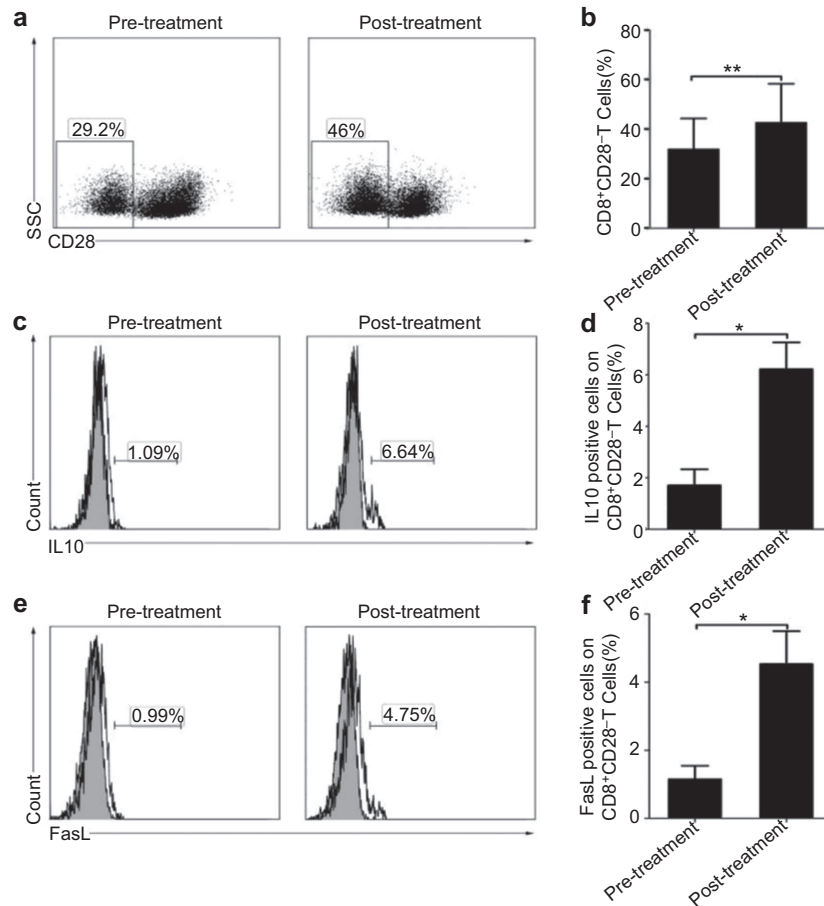

**Supplemental Figure 8** MSCs increase the percentage and function of CD8<sup>+</sup>CD28<sup>-</sup> T-cell subset in CR/PR cGVHD patients. The flow cytometry plots represented the percentage of CD28<sup>-</sup> T cells by gating on CD3<sup>+</sup>CD8<sup>+</sup> T cells in the peripheral blood from CR/PR cGVHD patients pre-MSCTreatment and post-MSCTreatment (a). CR/PR patients ( $n=10$ ) had significantly higher frequency of CD8<sup>+</sup>CD28<sup>-</sup> T cells post-MSCTreatment (b). The expression of IL-10 and FasL on CD8<sup>+</sup>CD28<sup>-</sup> T cells were increased post-MSCTreatment in CR/PR patients ( $n=3$ ) (c-f). The gray histograms correspond to the isotype controls. The bar graphs indicate the means  $\pm$  s.d.,  $n=10$ ; statistically significant differences are indicated as follows: \* $P<0.05$  and \*\* $P<0.01$ .



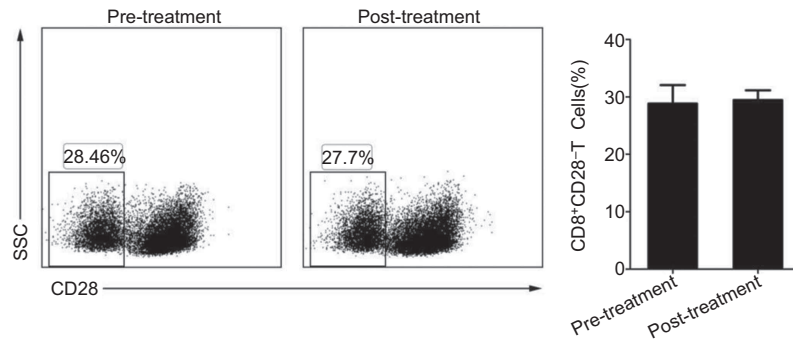

**Supplemental Figure 9** No change in the percentage of CD8<sup>+</sup>CD28<sup>-</sup> T cells was observed in cGVHD patients that non-response to MSC treatment. The flow cytometry plots represented the percentage of CD28<sup>-</sup> T cells by gating on CD3<sup>+</sup>CD8<sup>+</sup> T cells in the peripheral blood from NR cGVHD patients pre-MSCs treatment and post-MSCs treatment. NR patients ( $n=3$ ) had no change in frequency of CD8<sup>+</sup>CD28<sup>-</sup> T cells post-MSC treatment. The bar graphs indicate the means  $\pm$  s.d.

**Supplemental Table 1 Clinical characteristics of cGVHD patients**

|    | <i>Sex</i> | <i>Age</i> | <i>Disease</i> | <i>Time post-HSCT<br/>(day)</i> | <i>Source of graft</i> | <i>HLA matching</i> | <i>Grade of<br/>cGVHD</i> | <i>Organ involvement</i>                 | <i>Response to<br/>MSC infusion</i> |
|----|------------|------------|----------------|---------------------------------|------------------------|---------------------|---------------------------|------------------------------------------|-------------------------------------|
| 1  | Male       | 34         | ANLL           | 107                             | Peripheral blood       | Matched, related    | Moderate                  | Skin, oral mucosa                        | CR                                  |
| 2  | Female     | 23         | ALL            | 313                             | Peripheral blood       | Matched, related    | Moderate                  | Oral mucosa, eyes, lung                  | PR                                  |
| 3  | Male       | 22         | ALL            | 157                             | Peripheral blood       | Matched, related    | Severe                    | Skin, oral mucosa, eyes, lung            | PR                                  |
| 4  | Male       | 25         | CML            | 126                             | Peripheral blood       | Matched, related    | Severe                    | Skin, oral mucosa, GI                    | PR                                  |
| 5  | Male       | 27         | NHL            | 705                             | Peripheral blood       | Matched, related    | Severe                    | Skin, oral mucosa, joint                 | NR                                  |
| 6  | Male       | 21         | ALL            | 143                             | Peripheral blood       | Matched, related    | Severe                    | Skin, eyes, GI, lung, joint              | PR                                  |
| 7  | Male       | 23         | ANLL           | 106                             | Peripheral blood       | Matched, related    | Moderate                  | Skin, oral mucosa, GI, liver             | CR                                  |
| 8  | Female     | 41         | CML            | 121                             | Peripheral blood       | Matched, related    | Severe                    | Skin, GI, lung, joint                    | NR                                  |
| 9  | Male       | 18         | ANLL           | 115                             | Peripheral blood       | Mismatched          | Severe                    | Skin, liver                              | PR                                  |
| 10 | Male       | 32         | ALL            | 151                             | Peripheral blood       | Matched, related    | Severe                    | Skin, eyes, GI, liver, joint             | PR                                  |
| 11 | Male       | 28         | ALL            | 325                             | Peripheral blood       | Matched, related    | Severe                    | Skin, oral mucosa, eyes, liver           | CR                                  |
| 12 | Female     | 41         | ANLL           | 293                             | Peripheral blood       | Matched, related    | Moderate                  | Skin, oral mucosa, eyes, GI,             | NR                                  |
| 13 | Male       | 36         | CML            | 840                             | Bone marrow            | Matched, related    | Severe                    | Skin, oral mucosa, eyes,<br>liver, joint | PR                                  |

Abbreviations: ALL, acute lymphoblastic leukemia; ANLL, acute non-lymphocytic leukemia; cGVHD, chronic graft-versus-host disease; CML, chronic monocytic leukemia; CR, complete response; GI, gastrointestinal; HLA, human leukocyte antigen; HSCT, hematopoietic stem cell transplantation; MSC, mesenchymal stromal cells; NHL, non-Hodgkin's lymphoma; NR, non-response; PR, partial response.
